# Supplementary material for: A Cross-Sectional Study of SARS-CoV-2 Antibodies and Risk Factors for Seropositivity in Staff in Day Care Facilities and Preschools in Denmark
Source: PubMed Central journal article supplement (PMC9927135; doi:10.1128/spectrum.04174-22), 2022-12-22
Supplement: spectrum.04174-22-s0001.pdf [file spectrum.04174-22-s0001.pdf]

**Supplementary figure 1: General national recommendations from the Danish Health authorities during the study period**

|   |                                                                                                                                                                                                                                                                                                                                                                                                        |
|---|--------------------------------------------------------------------------------------------------------------------------------------------------------------------------------------------------------------------------------------------------------------------------------------------------------------------------------------------------------------------------------------------------------|
| 1 | Keep a distance of 2 meters whenever possible (at least 1 meter).                                                                                                                                                                                                                                                                                                                                      |
| 2 | Avoid handshakes, hugging and kissing on the cheek.                                                                                                                                                                                                                                                                                                                                                    |
| 3 | If you get COVID-19 symptoms, isolate yourself and have an antigen and/or PCR test performed.                                                                                                                                                                                                                                                                                                          |
| 4 | On a regular basis, ventilate your home by opening windows and doors.                                                                                                                                                                                                                                                                                                                                  |
| 5 | Avoid gathering too many people indoors.                                                                                                                                                                                                                                                                                                                                                               |
| 6 | Sneeze or cough into your sleeve.                                                                                                                                                                                                                                                                                                                                                                      |
| 7 | Use hand sanitizer or frequent hand washing.                                                                                                                                                                                                                                                                                                                                                           |
| 8 | Clean thoroughly and on a regular basis, especially surfaces that are touched frequently.                                                                                                                                                                                                                                                                                                              |
| 9 | Persons aged 12 and up are required to wear face masks or shields in the following places: public transportation, wholesale and retail stores, premises for cultural, sports, and club activities, religious communities, day-care facilities, schools, education institutions, public and private hospitals and clinics, and premises where clients are offered services involving physical contacts. |
